# Supplementary material for: PdMFS1 Transporter Contributes to Penicilliun digitatum Fungicide Resistance and Fungal Virulence during Citrus Fruit Infection
Source: PubMed Central journal article supplement (PMC6958471; doi:10.3390/jof5040100), 2019-10-18
Supplement: jof-05-00100-s001.pdf [file jof-05-00100-s001.pdf]

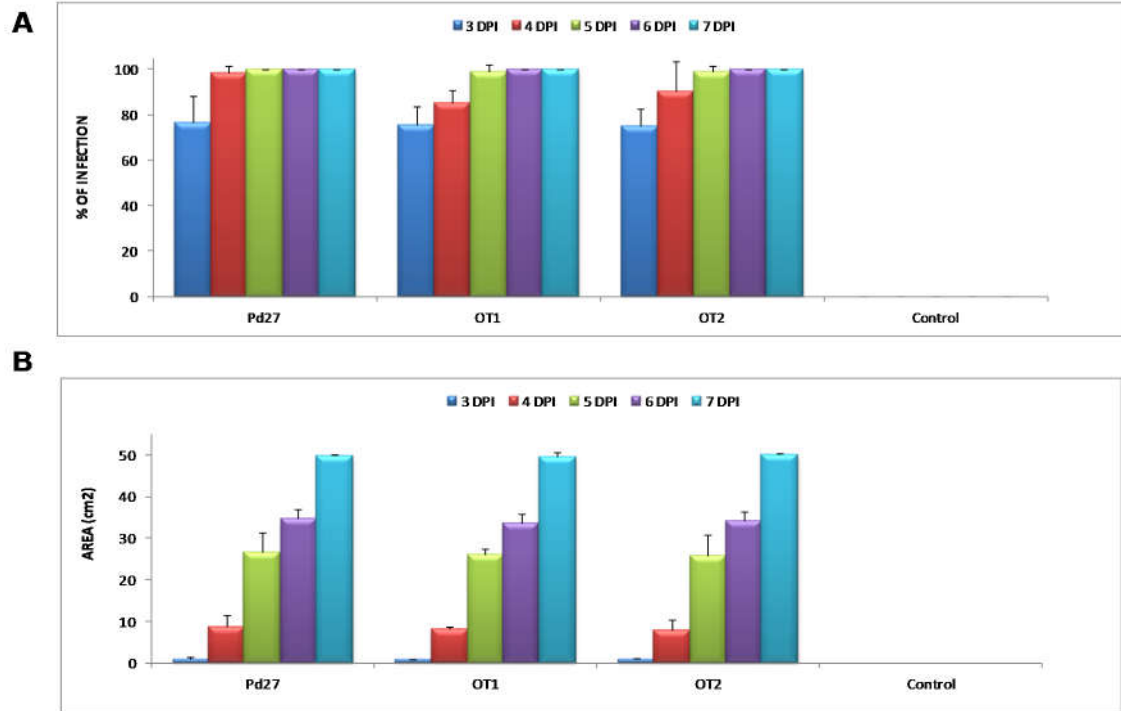

**Supplementary Figure S1.** Evaluation of virulence as (A) disease intensity (%) and (B) disease severity (cm<sup>2</sup>). Virulence evaluation of Pd27 and the overexpression transformants (OT1, OT2). All are mean of three infection experiments. Control correspond to oranges mock inoculated. Error bars represent standard deviation. \*Significant differences between treatments using Tukey's test ( $P < 0.05$ ) at each dpi.

**Table 1.** Oligo sequence used in this study.

| Name  | Sequence (5'-3')                |
|-------|---------------------------------|
| M1-1  | ACTTTCGGAGTCGGTTGCAC            |
| M1-2  | TACCGCCGATGGACAGGAAC            |
| M1-3  | ACGAGGAGCTGCTAGGCCGC            |
| M1-4  | CTAGGAACGAAGCATTTCAGC           |
| M1-5  | ATGGAACGCCTTTAACTTGG            |
| M1-6  | ATCAAGCAGCAAGTCGTTGG            |
| M1-7  | GGTCTTAAUACGAGGAGCTGCTAGGCCGC   |
| M1-8  | GGCATTAAUCTAGGAACGAAGCATTTCAGC  |
| M1-9  | GGACTTAAUATGGAACGCCTTTAACTTGG   |
| M1-10 | GGGTTTAAUATCAAGCAGCAAGTCGTTGG   |
| M1-11 | CTAGATAAGGTTCCCAGGAC            |
| M1-12 | GGGTTTAAUGCGATAAGAGCCGGATTTTCAG |
| M1-13 | GGACTTAAUAGCTATTCCATGGACCGATATG |
| M1-14 | ACCTTTGCGAACATATCGGTC           |
| M1-16 | AGTCACACCAGCCCCGATAG            |
| HygRt | ATCGAAGCTGAAAGCACGAG            |
| HygFt | GGCAATTTTCGATGATGCAGC           |
| HygR  | AGCTGCGCCGATGGTTTCTACAA         |
| HygF  | GCGCGTCTGCTGCTCCATACAA          |
| hTubF | AGCGGTGACAAGTACGTTCC            |
| hTubR | ACCCTTAGCCCAGTTGTTAC            |
| qTubF | AGCGGTGACAAGTACGTTCC            |
| qTubR | ACCCTTAGCCCAGTTGTTAC            |
| q28SF | TTATAGCCGAGGGTGCAATG            |
| q28SR | TTTCAAGACGGGTCGCTTAC            |
| qH3F  | AGGCTCCCCGTAAGCAGCTCGC          |
| qH3R  | CGACATGAGGCGGAACTTACCGG         |
| qM1-F | AGTTGCAGCTGCGTACGATG            |
| qM1-R | ACCAAATTGCCGAGACCACG            |
